# Supplementary material
Source: Springer Nature journal article supplement (https://www.springermedizin.de/resource/supplementary/13047_2009_109_MOESM5_ESM.pdf/9663166)

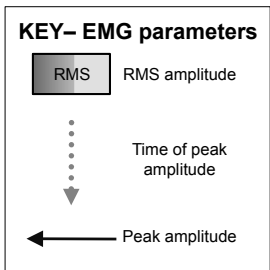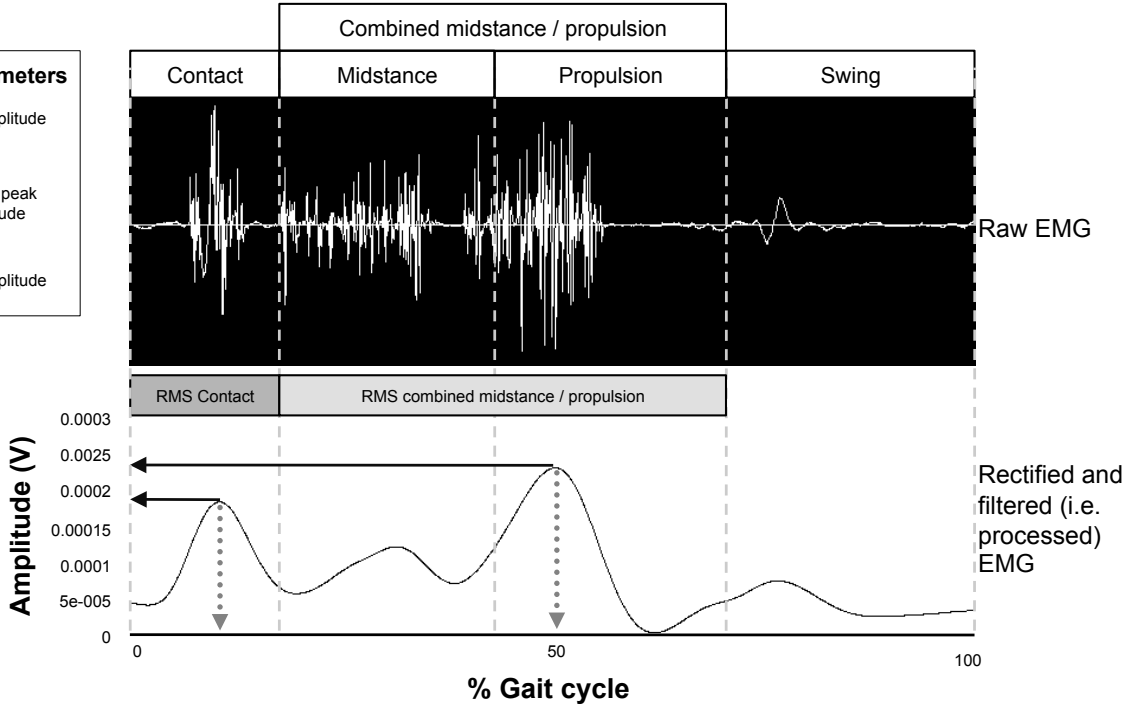

Supplement: MOESM5 [file 9663166]
